# Supplementary material
Source: PubMed Central journal article supplement (PMC6145771)
Supplement: jamaophthalmol-136-622-s001.pdf [file jamaophthalmol-136-622-s001.pdf]

## Supplementary Online Content

Lee YH, Chen AX, Varadaraj V, et al. Comparison of access to eye care appointments between patients with Medicaid and those with private health care insurance. *JAMA Ophthalmol*. Published online April 19, 2018. doi:10.1001/jamaophthalmol.2018.0813

**eTable.** Characteristics of Counties

**eMethods 1.** Telephone Call Script

**eMethods 2.** Qualtrics Survey

This supplementary material has been provided by the authors to give readers additional information about their work.

**eTable.** Characteristics of Counties**Maryland Counties**

| <b>County Names</b> | <b>Population</b> | <b>Urban/Rural</b> | <b>Minority Population (%)</b> | <b>Median Household Income</b> |
|---------------------|-------------------|--------------------|--------------------------------|--------------------------------|
| Allegany            | 72,130            | Urban              | 12.8                           | \$ 41,559                      |
| Anne Arundel        | 568,346           | Urban              | 30.9                           | \$ 91,918                      |
| Baltimore           | 831,026           | Urban              | 41.9                           | \$ 68,989                      |
| Baltimore City      | 614,664           | Urban              | 72.3                           | \$ 44,262                      |
| Calvert             | 91,251            | Urban              | 21.3                           | \$ 96,808                      |
| Caroline            | 32,850            | Rural              | 76.1                           | \$ 50,830                      |
| Carroll             | 167,656           | Urban              | 10.4                           | \$ 87,060                      |
| Cecil               | 102,603           | Urban              | 14.6                           | \$ 67,938                      |
| Charles             | 157,705           | Urban              | 58.3                           | \$ 91,373                      |
| Dorchester          | 32,258            | Rural              | 36.6                           | \$ 47,907                      |
| Frederick           | 247,591           | Urban              | 25.6                           | \$ 85,715                      |
| Garrett             | 29,425            | Rural              | 3.6                            | \$ 46,277                      |
| Harford             | 251,032           | Urban              | 23.3                           | \$ 81,052                      |
| Howard              | 317,233           | Urban              | 46.7                           | \$ 113,800                     |
| Kent                | 19,730            | Rural              | 22.2                           | \$ 55,028                      |
| Montgomery          | 1,043,863         | Urban              | 55.3                           | \$ 100,352                     |
| Prince George's     | 908,049           | Urban              | 86.9                           | \$ 75,925                      |
| Queen Anne's        | 48,929            | Rural              | 13.3                           | \$ 85,891                      |
| Saint Mary's        | 112,587           | Rural              | 25.1                           | \$ 86,810                      |
| Somerset            | 25,928            | Urban              | 51.4                           | \$ 35,886                      |
| Talbot              | 37,278            | Rural              | 22                             | \$ 61,395                      |
| Washington          | 150,292           | Urban              | 20.2                           | \$ 56,316                      |
| Wicomico            | 102,577           | Urban              | 36.6                           | \$ 53,508                      |
| Worcester           | 51,444            | Urban              | 19.8                           | \$ 57,227                      |

**Michigan Counties**

| <b>County Names</b> | <b>Population</b> | <b>Urban/Rural</b> | <b>Minority Population (%)</b> | <b>Median Household Income</b> |
|---------------------|-------------------|--------------------|--------------------------------|--------------------------------|
| Alcona              | 10,352            | Rural              | 4                              | \$ 38,160                      |
| Alger               | 9,219             | Rural              | 16.5                           | \$ 41,270                      |
| Allegan             | 115,548           | Rural              | 11.3                           | \$ 55,630                      |

|                |         |       |      |           |
|----------------|---------|-------|------|-----------|
| Alpena         | 28,704  | Rural | 4.1  | \$ 39,832 |
| Antrim         | 23,144  | Rural | 5    | \$ 48,825 |
| Arenac         | 15,122  | Rural | 5.2  | \$ 39,240 |
| Baraga         | 8,503   | Rural | 27.2 | \$ 42,810 |
| Barry          | 59,702  | Rural | 5.4  | \$ 56,883 |
| Bay            | 104,747 | Urban | 9.8  | \$ 45,851 |
| Benzie         | 17,572  | Rural | 6.2  | \$ 48,694 |
| Berrien        | 154,010 | Urban | 24.7 | \$ 45,980 |
| Branch         | 43,427  | Rural | 9.3  | \$ 46,428 |
| Calhoun        | 134,386 | Urban | 22   | \$ 44,681 |
| Cass           | 51,599  | Rural | 13.6 | \$ 47,991 |
| Charlevoix     | 26,174  | Rural | 6.1  | \$ 48,603 |
| Cheboygan      | 25,401  | Rural | 7.9  | \$ 41,023 |
| Chippewa       | 37,724  | Rural | 30   | \$ 42,287 |
| Clare          | 30,358  | Rural | 5.1  | \$ 34,911 |
| Clinton        | 77,888  | Urban | 9.9  | \$ 62,646 |
| Crawford       | 13,744  | Rural | 5    | \$ 41,034 |
| Delta          | 36,202  | Rural | 7    | \$ 42,353 |
| Dickinson      | 25,535  | Rural | 4.5  | \$ 43,373 |
| Eaton          | 109,160 | Urban | 16.7 | \$ 56,472 |
| Emmet          | 33,182  | Rural | 8.6  | \$ 51,096 |
| Genesee        | 408,615 | Urban | 27.4 | \$ 43,246 |
| Gladwin        | 25,122  | Rural | 4.1  | \$ 39,629 |
| Gogebic        | 15,243  | Rural | 10.4 | \$ 35,833 |
| Grand Traverse | 92,084  | Rural | 7.5  | \$ 55,597 |
| Gratiot        | 41,202  | Rural | 13.3 | \$ 42,145 |
| Hillsdale      | 45,774  | Rural | 5    | \$ 44,458 |
| Houghton       | 36,555  | Rural | 7.7  | \$ 39,080 |
| Huron          | 31,481  | Rural | 4.6  | \$ 43,082 |
| Ingham         | 288,051 | Urban | 29.7 | \$ 46,842 |
| Ionia          | 64,232  | Rural | 11.6 | \$ 50,037 |
| Iosco          | 25,327  | Rural | 5.8  | \$ 38,900 |
| Iron           | 11,195  | Rural | 5.2  | \$ 33,137 |
| Isabella       | 71,282  | Rural | 14.5 | \$ 40,706 |
| Jackson        | 158,460 | Urban | 15.1 | \$ 47,709 |
| Kalamazoo      | 261,654 | Urban | 22.1 | \$ 49,693 |
| Kalkaska       | 17,263  | Rural | 5.5  | \$ 42,612 |
| Kent           | 642,173 | Urban | 25.7 | \$ 54,673 |
| Keweenaw       | 2,199   | Rural | 2.6  | \$ 41,472 |

|              |           |       |      |           |
|--------------|-----------|-------|------|-----------|
| Lake         | 11,496    | Rural | 15.1 | \$ 30,824 |
| Lapeer       | 88,340    | Urban | 8    | \$ 54,174 |
| Leelanau     | 21,765    | Rural | 9.5  | \$ 59,018 |
| Lenawee      | 98,504    | Rural | 13.2 | \$ 49,300 |
| Livingston   | 188,624   | Urban | 50   | \$ 76,764 |
| Luce         | 6,358     | Rural | 21.3 | \$ 38,167 |
| Mackinac     | 10,820    | Rural | 26.3 | \$ 40,747 |
| Macomb       | 867,730   | Urban | 20.3 | \$ 55,951 |
| Manistee     | 24,373    | Rural | 10.8 | \$ 42,530 |
| Marquette    | 66,435    | Rural | 7.7  | \$ 46,822 |
| Mason        | 28,876    | Rural | 8.6  | \$ 43,497 |
| Mecosta      | 43,221    | Rural | 8.7  | \$ 41,827 |
| Menominee    | 23,281    | Rural | 6.8  | \$ 41,235 |
| Midland      | 83,462    | Urban | 8.5  | \$ 54,852 |
| Missaukee    | 15,102    | Rural | 5.9  | \$ 42,077 |
| Monroe       | 149,208   | Urban | 8.3  | \$ 56,968 |
| Montcalm     | 62,974    | Rural | 8    | \$ 43,126 |
| Montmorency  | 9,173     | Rural | 4    | \$ 37,145 |
| Muskegon     | 173,408   | Urban | 23.6 | \$ 43,920 |
| Newaygo      | 47,938    | Rural | 9.3  | \$ 44,049 |
| Oakland      | 1,243,970 | Urban | 27.4 | \$ 69,850 |
| Oceana       | 26,027    | Rural | 17.9 | \$ 41,952 |
| Ogemaw       | 20,904    | Rural | 5.2  | \$ 36,941 |
| Ontonagon    | 5,911     | Rural | 4.8  | \$ 35,038 |
| Osceola      | 23,110    | Rural | 5.3  | \$ 39,247 |
| Oscoda       | 8,264     | Rural | 4.2  | \$ 35,175 |
| Otsego       | 24,470    | Rural | 5.6  | \$ 50,793 |
| Ottawa       | 282,250   | Urban | 15.8 | \$ 61,367 |
| Presque Isle | 12,762    | Rural | 4    | \$ 41,570 |
| Roscommon    | 23,700    | Rural | 5.1  | \$ 35,959 |
| Saginaw      | 192,326   | Urban | 30.4 | \$ 43,712 |
| Sanilac      | 41,409    | Rural | 5.9  | \$ 42,037 |
| Schoolcraft  | 8,001     | Rural | 14   | \$ 36,649 |
| Shiawassee   | 68,554    | Rural | 5.7  | \$ 48,470 |
| St. Clair    | 159,587   | Urban | 8.8  | \$ 50,930 |
| St. Joseph   | 60,853    | Rural | 13.4 | \$ 45,410 |
| Tuscola      | 53,338    | Rural | 6.4  | \$ 44,193 |
| Van Buren    | 75,223    | Rural | 18.6 | \$ 47,141 |
| Washtenaw    | 364,709   | Urban | 29.4 | \$ 62,484 |

|         |           |       |      |           |
|---------|-----------|-------|------|-----------|
| Wayne   | 1,749,366 | Urban | 50.3 | \$ 42,043 |
| Wexford | 33,163    | Rural | 5.3  | \$ 40,417 |

## **eMethods 1. Telephone Call Script**

### Adult script

“Hi, my name is \_\_\_ I have Medicaid/BCBS insurance and need to see an eye doctor. Can I get an appointment to see Dr. \_\_\_ for a diabetic eye exam?”

*if questioned the reason for appointment:* “I’m diabetic and was told by my primary doctor that I need to have my eyes checked”

*if questioned about what type of coverage:* “I’m really not sure. I will have to check, but so that I know, what types do you accept?”

*if asked about specific plan #:* “I don’t have the insurance card with me. Can I bring it to the appointment?”

*if offer to make an appointment:* “when is the soonest that I could see Dr. \_\_\_\_\_?” *wait for response* ... “I am actually going to check my calendar just to make sure that date works, can I call you back and let you know before you book the appointment?”

*if offered appointment with another doctor in practice than the one you called about, at this point say:* “in case that date doesn’t work for me, are there other doctors in the practice besides Dr. \_\_\_ who will see new patients with Medicaid/BCBS?” *wait for response* “Okay thank you for your help. I will let you know if that date will work.”

*If not offered an appointment:* “Can I ask the reason for why Dr. \_\_\_ is not able to see me?”

*Record NPI (or first and last name + phone); date of phone call; if phone number wrong or disconnected; responses for parent & child (0/1); date of soonest appointment offered and type of Medicaid accepted (will code for FFS vs managed care). If offered appointment with another doctor but not the one you called about, data should be entered for both doctors (first doctor coded as ‘no appointment given’). Also, record the total number of attempts made to reach a provider.*

### Child script

“Hi, my name is \_\_\_ my eight year-old child failed a school vision screening, so I was told to make an appointment with an eye doctor for him. Do you see kids with Medicaid/BCBS?”

*if questioned about what type of coverage:* “I’m really not sure. I will have to check, but so that I know, what types do you accept?”

*if asked about specific plan #:* “I don’t have the insurance card with me. Can I bring it to the appointment?”

*if offer to make an appointment:* “when is the soonest that my child could see Dr. \_\_\_\_\_?” *wait for response* ... “I am actually going to check my calendar just to make sure that date works, can I call you back and let you know before you book the appointment?”

*if offered appointment with another doctor in practice than the one you called about, at this point say: “in case that date doesn’t work for me, are there other doctors in the practice besides Dr. \_\_\_ who will see new patients with Medicaid?” wait for response “Okay thank you for your help. I will let you know if that date will work.”*

*If not offered an appointment: “Can I ask the reason for why Dr. \_\_\_ is not able to see my child?”*

**eMethods 2. Qualtrics Survey**

Q1 NPI

Q2 Provider Name (Last, First)

Q3 Provider Type

- M.D. (1)
- O.D. (2)

Q4 Phone number listed on directory (xxx-xxx-xxxx)

Q5 State

- Maryland (1)
- Michigan (2)



**Display This Question:**

**If State Maryland Is Selected**

Q6 MD County

- Allegany (1)
- Anne Arundel (2)
- Baltimore (3)
- Baltimore City (4)
- Calvert (5)
- Caroline (6)
- Carroll (7)
- Cecil (8)
- Charles (9)
- Dorchester (10)
- Frederick (11)
- Garrett (12)
- Harford (13)
- Howard (14)
- Kent (15)
- Montgomery (16)
- Prince George's (17)
- Queen Anne's (18)
- St. Mary's (19)
- Somerset (20)
- Talbot (21)
- Washington (22)
- Wicomico (23)
- Worcester (24)

**Display This Question:**

**If State Michigan Is Selected**

Q7 MI County

- Alcona (1)
- Alger (2)
- Allegan (3)
- Alpena (4)
- Antrim (5)
- Arenac (6)
- Baraga (7)
- Barry (8)
- Bay (9)
- Benzie (10)
- Berrien (11)
- Branch (12)
- Calhoun (13)
- Cass (14)
- Charlevoix (15)
- Cheboygan (16)
- Chippewa (17)
- Clare (18)
- Clinton (19)
- Crawford (20)
- Delta (21)
- Dickinson (22)
- Eaton (23)
- Emmet (24)
- Genesee (25)
- Gladwin (26)
- Gogebic (27)
- Grand Traverse (28)
- Gratiot (29)
- Hillsdale (30)
- Houghton (31)
- Huron (32)
- Ingham (33)
- Ionia (34)
- Iosco (35)
- Iron (36)

- Isabella (37)
- Jackson (38)
- Kalamazoo (39)
- Kalkaska (40)
- Kent (41)
- Keweenaw (42)
- Lake (43)
- Lapeer (44)
- Leelanau (45)
- Lenawee (46)
- Livingston (47)
- Luce (48)
- Mackinac (49)
- Macomb (50)
- Manistee (51)
- Marquette (52)
- Mason (53)
- Mecosta (54)
- Menominee (55)
- Midland (56)
- Missaukee (57)
- Monroe (58)
- Montcalm (59)
- Montmorency (60)
- Muskegon (61)
- Newaygo (62)
- Oakland (63)
- Oceana (64)
- Ogemaw (65)
- Ontonagon (66)
- Osceola (67)
- Oscoda (68)
- Otsego (69)
- Ottawa (70)
- Presque Isle (71)
- Roscommon (72)
- Saginaw (73)
- St. Clair (74)
- St. Joseph (75)
- Sanilac (76)

- Schoolcraft (77)
- Shiawassee (78)
- Tuscola (79)
- Van Buren (80)
- Washtenaw (81)
- Wayne (82)
- Wexford (83)

Q8 Urban or Rural

- Urban (1)
- Rural (2)

Q9 Patient type

- Medicaid (1)
- BlueCross Blue Shield (2)
- Other: (3) \_\_\_\_\_

Q10 Today's Date (MM/DD/YY)

Q11 Answer phone call?

- Yes (1)
- No answer (2)
- Wrong number (3)

**If Yes Is Selected, Then Skip To Appointment offered?**

**If No answer Is Selected, Then Skip To PAUSE SURVEY Today's Date (MM/DD/YY)**

**If Wrong number Is Selected, Then Skip To Alternate phone number where the prov...**

Q12 PAUSE SURVEY Trial 2 Today's Date (MM/DD/YY)

Q13 Answer phone call?

- Yes (1)
- No answer (2)

**If Yes Is Selected, Then Skip To Appointment offered? If No answer Is Selected, Then Skip To Today's Date (MM/DD/YY)**

Q14 PAUSE SURVEY Trial 3 Today's Date (MM/DD/YY)

Q15 Answer phone call?

- Yes (1)
- No answer (2)

**If Yes Is Selected, Then Skip To Appointment offered?**

**If No answer Is Selected, Then Skip To How many calls were made until a succ...**

**Display This Question:**

**If Answer phone call? Wrong number Is Selected**

Q16 Another available phone number?

- Yes (1)
- No (2)

**If No Is Selected, Then Skip To End of Block**

**Display This Question:**

**If Another available phone number? Yes Is Selected**

Q17 Alternate phone number where the provider was reachable (xxx-xxx-xxxx)

Q18 Appointment offered?

- Yes (1)
- No (2)

**Display This Question:**

**If Appointment offered? Yes Is Selected**

Q19 Appointment Date (MM/DD/YY)

**Display This Question:**

**If Appointment offered? No Is Selected**

Q20 Reason for not offering an appointment:

- Insurance not accepted (1)
- Listed provider not at practice (3)
- Referral needed (2)
- Unreachable with 3 attempts (4)
- Other (5) \_\_\_\_\_

**Display This Question:**

**If Appointment offered? No Is Selected**

Q21 If said insurance is not covered, what insurance is covered?

- a) EyeMed (1)
- b) BCBS (2)
- c) VSP Vision Care (3)
- d) Aetna (4)
- e) United Healthcare (5)
- f) Medicare (8)
- g) BSP (10)
- h) Did not specify (7)
- i) Other (9) \_\_\_\_\_

Q22 Appointment offered with another provider?

- N/A (1)
- Name (Last, First) (2) \_\_\_\_\_

**Display This Question:**

**If Appointment offered with another provider? Name (Last, First) Is Selected**

Q23 Reason for appointment with another provider?

- Listed provider not at practice (1)
- Listed provider not accepting new patients (4)
- Insurance not accepted (3)
- Another provider available sooner (2)
- Other (5) \_\_\_\_\_

Q24 Appointment offered for child?

- Yes (1)
- No (2)

**Display This Question:**

**If Appointment offered for child? Yes Is Selected**

Q25 Appointment Date (MM/DD/YYYY)

**Display This Question:**

**If Appointment offered for child? No Is Selected**

Q26 Reason for not offering an appointment:

- Insurance not accepted (2)
- Listed provider not at practice (4)
- Needs to be seen by general ophthalmologist first (1)
- Listed provider does not see pediatric patients (3)
- Unreachable with 3 attempts (5)
- Other (6) \_\_\_\_\_

Q27 Appointment offered with another provider?

- Yes (1)
- No (2)

**Display This Question:**

**If Appointment offered with another provider? Yes Is Selected**



Q28 Reason for appointment with another provider:

- Listed provider not at practice (1)
- Insurance not accepted (3)
- Another provider available sooner (4)
- Listed provider does not see pediatric patients (6)
- Other (5) \_\_\_\_\_

Q29 How many calls were made until a successful connection was made?

- 1 (1)
- 2 (2)
- 3 (3)
- unreachable with 3 attempts (4)
